# Supplementary material for: The German Version of the Strengths Use Scale: The Relation of Using Individual Strengths and Well-being
Source: PubMed Central journal article supplement (PMC5406780; doi:10.3389/fpsyg.2017.00637), 2017-04-27
Supplement: Presentation_1.pdf [file Presentation_1.pdf]

## Fragebogen zur Anwendung von Stärken (FAS)

Die folgenden 14 Fragen beziehen sich auf Ihre Stärken, d.h. auf jene Dinge, die Sie **besonders gut** können. Bitte vergeben Sie jeweils eine Zahl zwischen **1** (trifft überhaupt nicht zu) und **7** (trifft genau zu).

|     |                                                                                              | trifft über-<br>haupt nicht zu <span style="font-size: 1.2em;">→</span> trifft<br>genau zu |                          |                          |                          |                          |                          |                          |
|-----|----------------------------------------------------------------------------------------------|--------------------------------------------------------------------------------------------|--------------------------|--------------------------|--------------------------|--------------------------|--------------------------|--------------------------|
|     |                                                                                              | 1                                                                                          | 2                        | 3                        | 4                        | 5                        | 6                        | 7                        |
| 1.  | Ich bin regelmäßig in der Lage das zu tun, was ich am besten kann.                           | <input type="checkbox"/>                                                                   | <input type="checkbox"/> | <input type="checkbox"/> | <input type="checkbox"/> | <input type="checkbox"/> | <input type="checkbox"/> | <input type="checkbox"/> |
| 2.  | Ich mache immer Dinge, die meinen Stärken entsprechen.                                       | <input type="checkbox"/>                                                                   | <input type="checkbox"/> | <input type="checkbox"/> | <input type="checkbox"/> | <input type="checkbox"/> | <input type="checkbox"/> | <input type="checkbox"/> |
| 3.  | Ich versuche stets meine Stärken einzusetzen.                                                | <input type="checkbox"/>                                                                   | <input type="checkbox"/> | <input type="checkbox"/> | <input type="checkbox"/> | <input type="checkbox"/> | <input type="checkbox"/> | <input type="checkbox"/> |
| 4.  | Durch den Einsatz meiner Stärken erreiche ich, was ich will.                                 | <input type="checkbox"/>                                                                   | <input type="checkbox"/> | <input type="checkbox"/> | <input type="checkbox"/> | <input type="checkbox"/> | <input type="checkbox"/> | <input type="checkbox"/> |
| 5.  | Ich setze meine Stärken jeden Tag ein.                                                       | <input type="checkbox"/>                                                                   | <input type="checkbox"/> | <input type="checkbox"/> | <input type="checkbox"/> | <input type="checkbox"/> | <input type="checkbox"/> | <input type="checkbox"/> |
| 6.  | Ich setze meine Stärken ein, um das zu bekommen, was ich vom Leben erwarte.                  | <input type="checkbox"/>                                                                   | <input type="checkbox"/> | <input type="checkbox"/> | <input type="checkbox"/> | <input type="checkbox"/> | <input type="checkbox"/> | <input type="checkbox"/> |
| 7.  | Meine Arbeit bietet mir viele Möglichkeiten meine Stärken einzusetzen.                       | <input type="checkbox"/>                                                                   | <input type="checkbox"/> | <input type="checkbox"/> | <input type="checkbox"/> | <input type="checkbox"/> | <input type="checkbox"/> | <input type="checkbox"/> |
| 8.  | Mein Leben bietet mir die Möglichkeit, meine Stärken auf unterschiedliche Weise einzusetzen. | <input type="checkbox"/>                                                                   | <input type="checkbox"/> | <input type="checkbox"/> | <input type="checkbox"/> | <input type="checkbox"/> | <input type="checkbox"/> | <input type="checkbox"/> |
| 9.  | Meine Stärken einzusetzen ist für mich selbstverständlich.                                   | <input type="checkbox"/>                                                                   | <input type="checkbox"/> | <input type="checkbox"/> | <input type="checkbox"/> | <input type="checkbox"/> | <input type="checkbox"/> | <input type="checkbox"/> |
| 10. | Ich empfinde es als sehr einfach, meine Stärken einzusetzen.                                 | <input type="checkbox"/>                                                                   | <input type="checkbox"/> | <input type="checkbox"/> | <input type="checkbox"/> | <input type="checkbox"/> | <input type="checkbox"/> | <input type="checkbox"/> |
| 11. | Ich bin in der Lage, meine Stärken in vielen verschiedenen Situationen einzusetzen.          | <input type="checkbox"/>                                                                   | <input type="checkbox"/> | <input type="checkbox"/> | <input type="checkbox"/> | <input type="checkbox"/> | <input type="checkbox"/> | <input type="checkbox"/> |
| 12. | Die meiste Zeit verbringe ich mit Tätigkeiten, die ich gut kann.                             | <input type="checkbox"/>                                                                   | <input type="checkbox"/> | <input type="checkbox"/> | <input type="checkbox"/> | <input type="checkbox"/> | <input type="checkbox"/> | <input type="checkbox"/> |
| 13. | Meine Stärken einzusetzen ist mir vertraut.                                                  | <input type="checkbox"/>                                                                   | <input type="checkbox"/> | <input type="checkbox"/> | <input type="checkbox"/> | <input type="checkbox"/> | <input type="checkbox"/> | <input type="checkbox"/> |
| 14. | Ich bin in der Lage meine Stärken auf unterschiedliche Art und Weise einzusetzen.            | <input type="checkbox"/>                                                                   | <input type="checkbox"/> | <input type="checkbox"/> | <input type="checkbox"/> | <input type="checkbox"/> | <input type="checkbox"/> | <input type="checkbox"/> |

Huber, A., Webb, D., & Höfer, S. (2017). The German Version of the Strengths Use Scale: The Relation of Using Individual Strengths and Well-being. *Frontiers in Psychology*, 8:637. Supplemental material. doi: 10.3389/fpsyg.2017.00637
